# Supplementary material for: Technical note: Fourier approach for estimating the thermal attributes of streams
Source: Copernicus journal article supplement (doi:10.5194/hess-20-3411-2016), 2016-08-24
Supplement: Supplementary file 1 [file hess-20-3411-2016-supplement.zip]

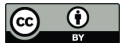

## *Supplement of*

# **Technical note: Fourier approach for estimating the thermal attributes of streams**

**Masahiro Ryo et al.**

*Correspondence to:* Masahiro Ryo (masahiroryo@gmail.com)

- hess-20-3411-2016-supplement-title-page.pdf
- Supplement
  - Supplement Information Figure S1.pdf
  - Supplement Information\_R script
    - \* Fourier\_1.R
    - \* Fourier\_2.R
    - \* example\_data1.txt
    - \* example\_data2.txt

The copyright of individual parts of the supplement might differ from the CC-BY 3.0 licence.
