# Supplementary material for: Technical note: Fourier approach for estimating the thermal attributes of streams
Source: Copernicus journal article supplement (doi:10.5194/hess-20-3411-2016), 2016-08-24
Supplement: Supplementary file 2 [file hess-20-3411-2016-supplement.zip]

**(a) Threshold = 0.05 (too sensitive)**

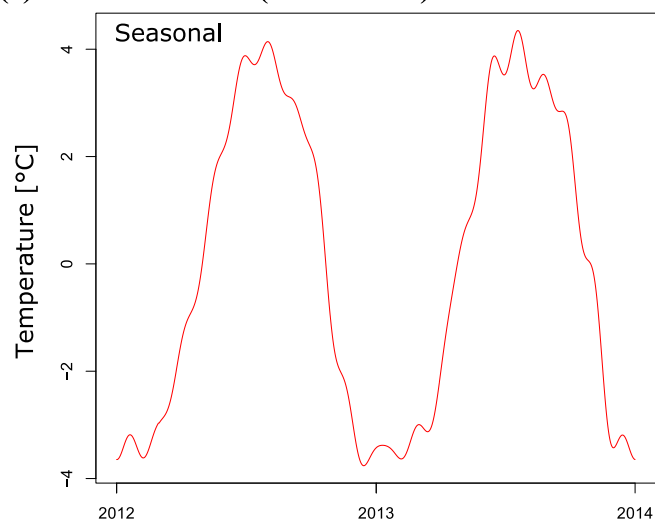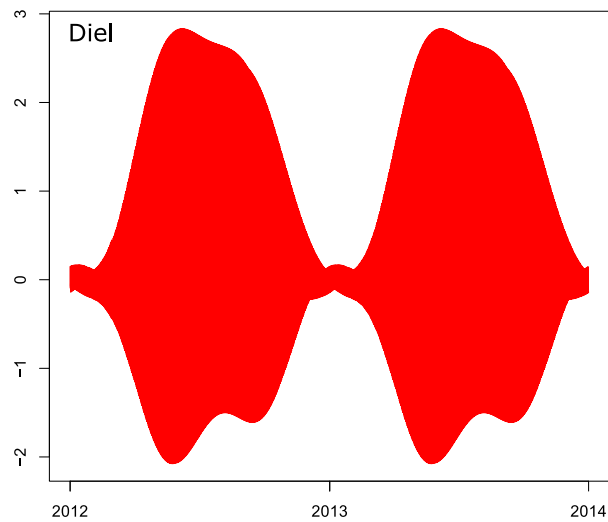

**(b) Threshold = 0.1 (used in this study)**

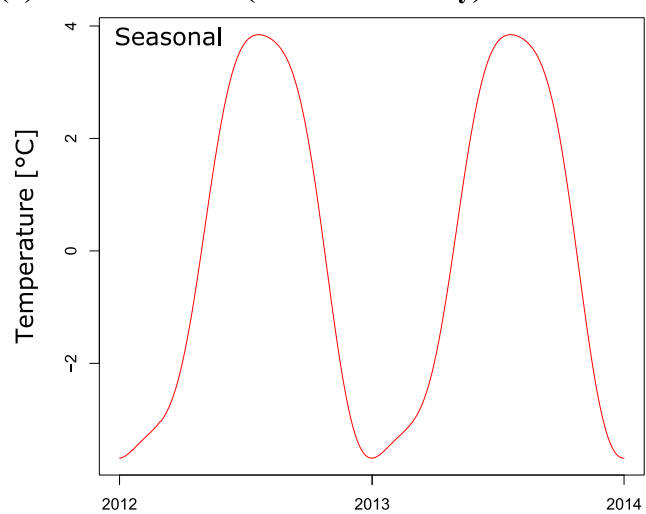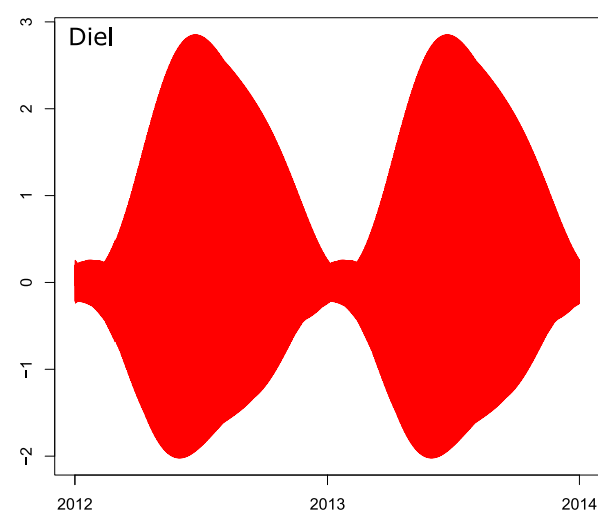

**(c) Threshold = 0.2 (over simplified)**

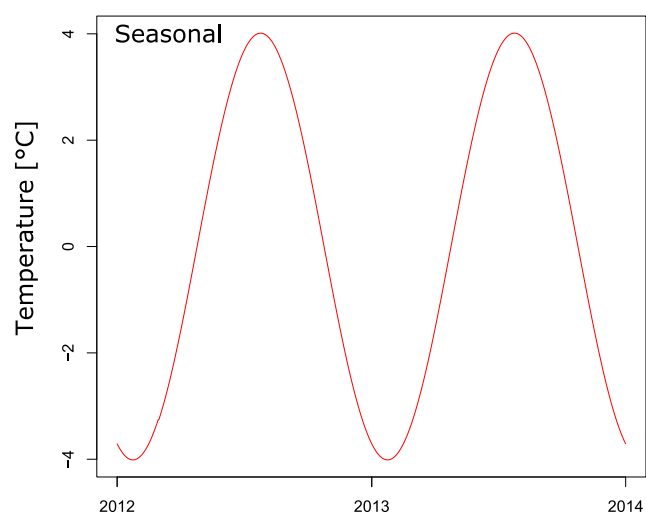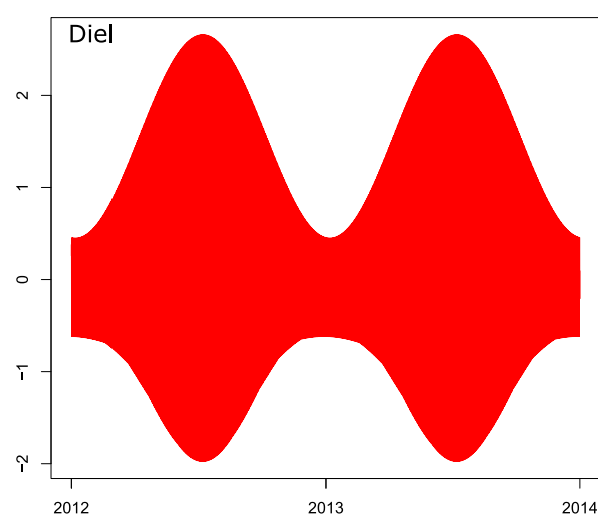

**Figure S1** Extracting seasonal and diel periodic patterns in temperature based on different threshold value for Fourier analysis. We employed 0.1 °C in our study.
